# Supplementary material for: Real-time solution measurement of RAD51- and RecA-mediated strand assimilation without background annealing
Source: PubMed Central journal article supplement — Nucleic Acids Res. 2013 May 10;41(13):e130. doi: 10.1093/nar/gkt362 (PMC3711447; doi:10.1093/nar/gkt362), 2013-05-10
Supplement: supp_gkt362_nar-00707-met-h-2013-File006.pdf [file supp_gkt362_nar-00707-met-h-2013-File006.pdf]

| Oligo name   | Length (nt) | Modification                                    | Sequence (5' to 3')                                                                                                     |
|--------------|-------------|-------------------------------------------------|-------------------------------------------------------------------------------------------------------------------------|
| DHD162-HP-L  | 85          |                                                 | TTT TCT AGA TCA TTT CTT TTG ATA AGA GGT CAT TTT TGC GGA TGG GAG ACC ATC CGC AAA AAT GAC CTC TTA TCA AAA GAA ATG A       |
| DHD162-HP-R  | 73          |                                                 | AGT CTC GAG CTT TTG ATA AGA GGT CAT TTT TGA GGA TGG GAG ACC ATC CTC AAA AAT GAC CTC TTA TCA AAA G                       |
| DHD162-CD-O  | 87          |                                                 | TCT AGA AAA TAA GTA TAA AAG CTT AAA TGA ATA AAC ATA GAA AAT AAA GTA AAG GAT ATA AAT GGC ATT GAG GGT TAC GGA TAA ATA     |
| DHD162-CD-CF | 87          | Internal Fluorescein between position 21 and 22 | CTC GAG ACT TAT TTA TCC GTA[F1] ACC CTC AAT GCC ATT TAT ATC CTT TAC TTT ATT TTC TAT GTT TAT TCA TTT AAG CTT TTA TAC TTA |
| DHD-HB       | 51          | 3' Biotin                                       | AAA TGA ATA AAC ATA GAA AAT AAA GTA AAG GAT ATA AAT GGC ATT GAG GGT[Bio]                                                |
| DHD-NB       | 51          | 3' Biotin                                       | GTT ATG TAC ATT GAC GTA TAT TAT ATA TAC TCT AGT AGT TAT CGA AGA CAT[Bio]                                                |
| DHD-HQ       | 51          | 3' Black Hole Quencher 1                        | AAA TGA ATA AAC ATA GAA AAT AAA GTA AAG GAT ATA AAT GGC ATT GAG GGT[BHQ]                                                |
| DHD-NQ       | 51          | 3' Black Hole Quencher 1                        | GTT ATG TAC ATT GAC GTA TAT TAT ATA TAC TCT AGT AGT TAT CGA AGA CAT[BHQ]                                                |
| RG1(+JA)     | 84          | 5' Alexa Fluor 488                              | [AF]GGT AGC GGT TGG GTG AGT GGT GGG GAG GGT CGG GAG GTG GCG TAG AAA CAT GAT AGG AAT GTG AAT GAA TGA AGT ACA AGT AAA     |
| RG1(-)       | 84          |                                                 | TTT ACT TGT ACT TCA TTC ATT CAC ATT CCT ATC ATG TTT CTA CGC CAC CTC CCG ACC CTC CCC ACC ACT CAC CCA ACC GCT ACC         |
| RG1(-)B      | 84          | 3' Biotin                                       | TTT ACT TGT ACT TCA TTC ATT CAC ATT CCT ATC ATG TTT CTA CGC CAC CTC CCG ACC CTC CCC ACC ACT CAC CCA ACC GCT ACC[Bio]    |
| RG1(-)Q      | 84          | 3' Black Hole Quencher 1                        | TTT ACT TGT ACT TCA TTC ATT CAC ATT CCT ATC ATG TTT CTA CGC CAC CTC CCG ACC CTC CCC ACC ACT CAC CCA ACC GCT ACC[BHQ]    |
| RG(rand)     | 84          |                                                 | CTC CCA GTG TTA TTA TCA AAT TGG ATT ACA CAT TAT AGG ATA ACT TGG TTA CAA GAC TAT TAG AGA GCA AGG TAA ATG AGT TAA         |
| RG(rand)B    | 84          | 3' Biotin                                       | CTC CCA GTG TTA TTA TCA AAT TGG ATT ACA CAT TAT AGG ATA ACT TGG TTA CAA GAC TAT TAG AGA GCA AGG TAA ATG AGT TAA[Bio]    |
| RG(rand)Q    | 84          | 3' Black Hole Quencher 1                        | TCC AGT GAT TGT GGT AAG GGA CTA CGA ACA TGC GGA CAT TAG AGA CGT ACA GCT ACC TAT CCT GAG CAC GGT TGG ATT TCA GAA[BHQ]    |
| 306.90       | 90          |                                                 | TAC GAA TGC ACA CGG TGT GGT GGG CCC AGG TAT TGT TAG CGG TTT GAA GCA GGC GGC AGA AGA AGT AAC AAA GGA ACC TAG AGG CCT TTT |

**Supplementary table 1:** List of ssDNA oligonucleotides used in this study.

**SUPPLEMENTAL FIGURES:**

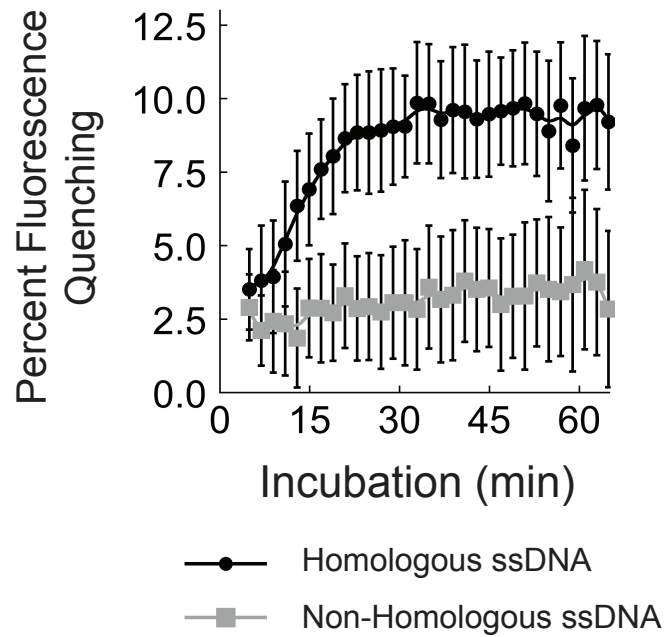

**Supplemental Figure 1: D-loop formation by RecA using ATP as a cofactor.** D-loops are detected as the fluorescence quenching that occurs upon pairing of the BHQ-labeled ssDNA with the complementary strand of the dsDNA, which contains an internal fluorescein label. The reaction was performed by combining 31 mM Tris-HCl (pH 7.5), 1.3 mM ATP, 13 mM MgCl<sub>2</sub>, 1.8 mM DTT, 1.32 μM BSA, 7.84 nM ssDNA, 11.14 nM DHD162, and 0.4 μM RecA in 25 μl and taking fluorescence measurements as described in the Methods section. DHD-HQ is used as the homologous ssDNA and DHD-NQ is used as the non-homologous ssDNA control. Kinetics of D-loop formation by *E. coli* RecA are displayed as the percent decrease in fluorescence, relative to the protein-free control. Error bars represent the standard error of four replicates.

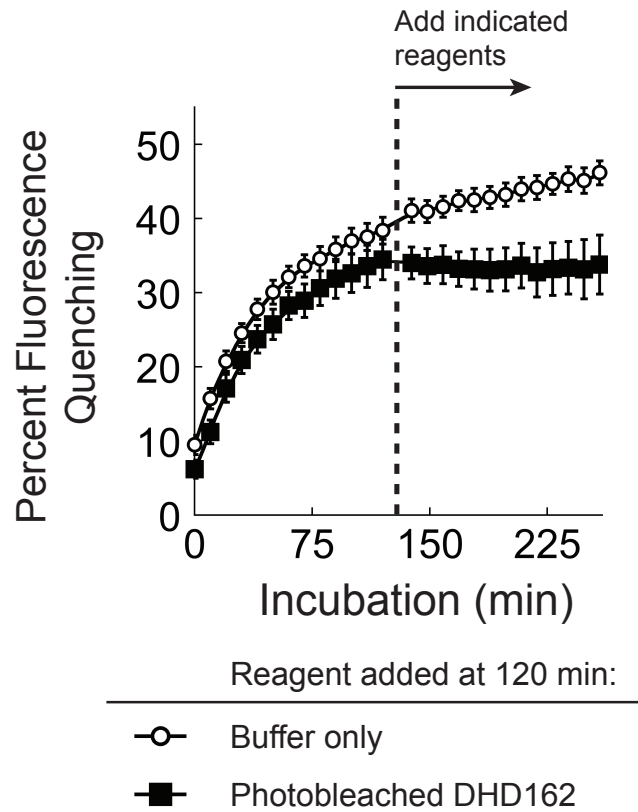

**Supplemental Figure 2: Stability of D-loops formed by human RAD51.** D-loops are detected as the fluorescence quenching that occurs upon pairing of the BHQ-labeled ssDNA with the complementary strand of the dsDNA, which contains an internal fluorescein label. The reaction was performed as described in the Methods section for fluorescence-based D-loop assay of RAD51. At 120 minutes, a 5  $\mu$ l aliquot of annealing buffer containing 1  $\mu$ M DHD162 (final concentration equimolar to DHD162 already in the reaction), which was photobleached to 14% of its original fluorescence, or 5  $\mu$ l of annealing buffer alone was added to the ongoing reactions and incubation was continued for another 120 minutes at 37  $^{\circ}$ C. Kinetics of D-loop formation are displayed as the percent decrease in fluorescence, relative to the protein-free control. Error bars represent the standard error of four replicates.
